# Supplementary material for: Rationally Guided Improvement of NOV1 Dioxygenase for the Conversion of Lignin-Derived Isoeugenol to Vanillin
Source: PubMed Central journal article supplement — Biochemistry. 2022 Jun 10;62(2):419–28. doi: 10.1021/acs.biochem.2c00168 (PMC9851154; doi:10.1021/acs.biochem.2c00168), 2022-06-10
Supplement: bi2c00168_si_001.pdf [file bi2c00168_si_001.pdf]

## Supporting Information

### **Rationally Guided Improvement of NOV1 Dioxygenase for the Conversion of Lignin-Derived Isoeugenol to Vanillin**

Mario De Simone<sup>1</sup>, Laura Alvigini<sup>2</sup>, Lur Alonso-Cotchico<sup>3</sup>, Vânia Brissos<sup>1</sup>, Jonatan Caroli<sup>2</sup>, Maria Fátima Lucas<sup>3</sup>, Emanuele Monza<sup>3</sup>, Eduardo Pinho Melo<sup>4</sup>, Andrea Mattevi<sup>2\*</sup> and Lúgia O Martins<sup>1\*</sup>

*<sup>1</sup>Instituto de Tecnologia Química e Biológica António Xavier, Universidade NOVA de Lisboa, Av. da República, 2780-157 Oeiras, Portugal*

*<sup>2</sup>Dept. Biology and Biotechnology, University of Pavia, Via Ferrata 9, 27100 Pavia, Italy*

*<sup>3</sup>Zymvol Biomodeling, Carrer Roc Boronat, 117, 08018 Barcelona, Spain*

*<sup>4</sup>Centro de Ciências do Mar, Universidade do Algarve, 8005-139 Faro, Portugal*

\*Correspondence: [andrea.mattevi@unipv.it](mailto:andrea.mattevi@unipv.it), [lmartins@itqb.unl.pt](mailto:lmartins@itqb.unl.pt)

## Computational methods

**Structure preparation.** The X-ray structures of the wild-type (PDB code: 5j55)<sup>1</sup> and S283F NOV1 variant (this work) were used as model systems. Both structures were cleaned with Yasara, the hydrogen atoms were added, and the hydrogen bond networks were optimized.<sup>2</sup> The loops composed of the residues 383-389 for the wild-type and 383-390 for the variant, missed in both X-ray structures, were built using BuildLoop.<sup>3</sup> The best-fit model was selected, and its structure was minimized using the AMBER14 force field.<sup>4</sup> From these templates, both the *apo* and *holo* forms of the NOV1 wild-type and S283F variant were modeled. For consistency, the *holo* forms of the proteins were built like Fe(II)-O<sub>2</sub> complexes (which represents a pre-catalytic center) and in their ligand-free form. In these structures, the vanillin molecule was manually removed. For the *holo* variant, an oxygen molecule was added and coordinated to the metal center (already present in the WT X-ray). The resulting Fe(II)-O<sub>2</sub> complex was minimized with the four histidine residues (167, 218, 284, 476) coordinating the metal; for the *apo* forms, the ligand, metal, and molecular oxygen were manually removed. The AMBER14 force field was used in all the energy and gradient calculations. The resulting systems were used as starting point for Molecular Dynamics (MD) simulations.

**Molecular Dynamics Simulations.** Four independent trajectories were run for four different systems: 1) wild-type in its Fe(II)-O<sub>2</sub> substrate-free form, 2) S283F in its Fe(II)-O<sub>2</sub> substrate-free form, 3) wild-type in its *apo* form, and 4) S283F variant in its *apo* form. The preparation of the NOV1 structures and the MD simulations were carried out using Yasara.<sup>5</sup> The setup included optimization of the hydrogen bonds network, pKa prediction at pH 7.4, solvation using a water buffer 9 Å around the protein to form a cubic box and charge neutralization using Na<sup>+</sup> ions. The system was then minimized with steepest descent and simulated annealing, followed by 400 ps of equilibration at constant volume, using a time step of 1 fs. The temperature was gradually increased to 300K, along the first half of the equilibration stage, and then kept fixed. Each production run, 16 in total, consisted of 200 ns at the same temperature at a fixed volume. The bonded and non-bonded forces were updated every 2.5 fs and 5 fs, respectively, and a Berendsen thermostat<sup>6</sup> was used to control the temperature. The protein was treated with the AMBER14 force field<sup>4</sup> and the waters with the TIP3P.<sup>7</sup> The van der Waals forces cutoff was set at 8 Å and the long-range electrostatic forces were represented using the Particle Mesh Ewald algorithm.<sup>8</sup> The LINCS<sup>9</sup> and SETTLE<sup>10</sup> algorithms were used to restrain stretching and bending terms involving the hydrogen atoms and the water molecules of the system.

**Free volume analysis.** MDpocket, part of the Fpocket suite<sup>11, 12</sup>, was used to assess the free volume available inside the core of the protein and active site along with the MD simulation timescale.

**Molecular graphics.** The molecular graphics have been created with YASARA ([www.yasara.org](http://www.yasara.org)), POVRay ([www.povray.org](http://www.povray.org))<sup>13</sup>, and PyMol.<sup>14</sup>

**Plots.** The treatment of numerical data and analytical plots have been performed using the python modules pandas,<sup>15, 16</sup> NumPy,<sup>17</sup> Matplotlib,<sup>17</sup> and Seaborn.<sup>18</sup>

**Table S1** - Primers used for the construction of the thirty-five variants used in this work.

| #  | Primers                            | Sequence                                                                                              |
|----|------------------------------------|-------------------------------------------------------------------------------------------------------|
| 1  | N120L Fwd<br>N120L Rev             | ACTGCACTCACAAATGCGTTTGTGTTTTCGGAGGTAAG<br>ATTTGTGAGTGCAGTCGAACGGATCTCTCCTTTAACAG                      |
| 2  | N120S Fwd<br>N120S Rev             | GATCCGTTTCGACTGCAAGCACAAATGCGTTTG<br>CAAACGCATTTGTGCTTGCAGTCGAACGGATC                                 |
| 3  | T121P Fwd<br>T121P Rev             | GCAAACCCAAATGCGTTTGTGTTTTCGGAGGTAAGTTGTG<br>CGCATTTGGGTTTGCAGTCGAACGGATCTCTC                          |
| 4  | T121A Fwd<br>T121A Rev             | CCGTTTCGACTGCAAACGCGAATGCGTTTGTGTTTTC<br>GAAAACAAACGCATTTCGCGTTTGCAGTCGAACGG                          |
| 5  | F281W Fwd<br>F281W Rev             | AATTGTTGGGCGTCTCACGTTTTGAACGCATG<br>AGACGCCCAACAATTGTCGCGGGTAAAC                                      |
| 6  | S283F Fwd<br>S283F Rev             | GCGTTTCACGTTTTGAACGCATGGCAGGAG<br>CAAACCGTGAAACGCAAACAATTGTCGCGGGTAAAC                                |
| 7  | S283Q Fwd<br>S283Q Rev             | GCGCAACACGTTTTGAACGCATGGCAGGAGGGAACAAAGATC<br>CAAACCGTGTTCGCAAAAACAATTGTCGCGGGTAAACCAACGAATAT         |
| 8  | S283I Fwd<br>S283I Rev             | GACAATTGTTTTGCGATTACGTTTTGAACGC<br>GCGTTCAAAACGTGAATCGCAAAAACAATTGTC                                  |
| 9  | S283E Fwd<br>S283E Rev             | GACAATTGTTTTGCGGTGCACGTTTTGAACGC<br>GCGTTCAAAACGTGCACCGCAAAAACAATTGTC                                 |
| 10 | S283N Fwd<br>S283N Rev             | GACAATTGTTTTGCGAACCACGTTTTGAACGC<br>GCGTTCAAAACGTGGTTCGCAAAAACAATTGTC                                 |
| 11 | S283V Fwd<br>S283V Rev             | GACAATTGTTTTGCGGTTACGTTTTGAACGC<br>GCGTTCAAAACGTGAACCGCAAAAACAATTGTC                                  |
| 12 | S283C Fwd<br>S283C Rev             | GACAATTGTTTTGCGTGCCACGTTTTGAACGC<br>GCGTTCAAAACGTGGCAGCAAAACAATTGTC                                   |
| 13 | S283T Fwd<br>S283T Rev             | GACAATTGTTTTGCGACCCACGTTTTGAACGC<br>GCGTTCAAAACGTGGGTCGCAAAAACAATTGTC                                 |
| 14 | F307H Fwd<br>F307H Rev             | GGCCAAAAACAATATGTGGCCTTTTTTCCCGACG<br>CGTCGGGAAAAAAGGCCACATATTGTTTTGGCC                               |
| 15 | F307W Fwd<br>F307W Rev             | AATATGTGGCCTTTTTTCCCGACGTTTCATGGCGCACCATTC AACG<br>AAAAGGCCACATATTGTTTTGGCTCACAAGTAACAAAGTGGA         |
| 16 | F309W Fwd<br>F309W Rev             | CAATATGTTCCCTTGTTTTCCCGACGTTTCATG<br>CATGAACGTCGGGAAACCAAGGGAACATATTG                                 |
| 17 | F473W Fwd<br>F473W Rev             | CAATCCGTCTGCGCTGGGGACTTCACGGGAAC<br>GTTCCCGTGAAGTCCCCAGCGCAGACGGATTG                                  |
| 18 | F473E Fwd<br>F473E Rev             | CAATCCGTCTGCGCGAAGGACTTCACGGGAAC<br>GTTCCCGTGAAGTCCCTTCGCGCAGACGGATTG                                 |
| 19 | F473Q Fwd<br>F473Q Rev             | CAATCCGTCTGCGCCAGGGACTTCACGGGAAC<br>GTTCCCGTGAAGTCCCTGGCGCAGACGGATTG                                  |
| 20 | L475S Fwd<br>L475S Rev             | CGTTTCGGATCTCACGGAACTGGGCAAATGCCGATGAAATTG<br>GTGAGATCCGAAGCGCAGACGGATTGGGATATTAACCGT                 |
| 21 | L475G Fwd<br>L475G Rev             | CAATCCGTCTGCGCTTCGGAGGCCACGGAACTGGGCAAATG<br>CATTTGCCAGTTCCCGTGGCCTCCGAAGCGCAGACGGATTG                |
| 22 | L475T Fwd<br>L475T Rev             | CAATCCGTCTGCGCTTCGGAAACCCACGGAACTGGGCAAATG<br>CATTTGCCAGTTCCCGTGGGTTCCGAAGCGCAGACGGATTG               |
| 23 | E353D Fwd<br>E353D Rev             | GTGACACCGCTGCGGATTTTCTCGCATCGAC<br>GTCGATGCGAGGAAAATCCGCAGCGGTGTCAC                                   |
| 24 | F281C-S283I Fwd<br>F281C-S283I Rev | GGTTTACCCGCGACAATTGTTGCGCGATTACGTTTTGAACGCATGGC<br>GCCATGCGTTACAAACGTGAATCGCGCAACAATTGTCGCGGGTAAACC   |
| 25 | F281C-S283T Fwd<br>F281C-S283T Rev | GGTTTACCCGCGACAATTGTTGCGCGACCCACGTTTTGAACGCATGGC<br>GCCATGCGTTCAAAACGTGGGTCGCGCAACAATTGTCGCGGGTAAACC  |
| 26 | F281I-S283V Fwd<br>F281I-S283V Rev | GGTTTACCCGCGACAATTGTATTGCGGTGCACGTTTTGAACGCATGGC<br>GCCATGTCAAACAGTGCACCCATACAATTGTCGCGGGTAAACC       |
| 27 | F281H-S283I Fwd<br>F281H-S283I Rev | GGTTTACCCGCGACAATTGTTCATGCGATTACGTTTTGAACGCATGGC<br>GCCATGCGTTCAAAACGTGAATCGCATGACAATTGTCGCGGGTAAACC  |
| 28 | F281H-S283V Fwd<br>F281H-S283V Rev | GGTTTACCCGCGACAATTGTTCATGCGGTGCACGTTTTGAACGCATGGC<br>GCCATGCGTTCAAAACGTGCACCGCATGACAATTGTCGCGGGTAAACC |

|    |                                       |                                                  |
|----|---------------------------------------|--------------------------------------------------|
| 29 | F281M-S283I Fwd                       | GGTTTACCCGCGACAATTGTATGGCGATTCACGTTTTGAACGCATGGC |
|    | F281M-S283I Rev                       | GCCATGTCAAAACGTGAATCGCCATACAATTGTCGCGGGTAAACC    |
| 30 | F281M-S283T Fwd                       | GGTTTACCCGCGACAATTGTATGGCGACCCACGTTTTGAACGCATGGC |
|    | F281M-S283T Rev                       | GCCATGCGTTCAAAACGTGGGTCGCCATACAATTGTCGCGGGTAAACC |
| 31 | F281M-S283V Fwd                       | GGTTTACCCGCGACAATTGTATGGCGGTGCACGTTTTGAACGCATGGC |
|    | F281M-S283V Rev                       | GCCATGCGTTCAAAACGTGCACCGCCATACAATTGTCGCGGGTAAACC |
| 32 | F473W-L475G Fwd                       | CCCAATCCGTCTGCGCTGGGGAGGCCACGGGAACTGGGCAAATGCC   |
|    | F473W-L475G Rev                       | GGCATTGCCCAGTTCCTGGCCTCCCCAGCGCAGACGGATTGGG      |
| 33 | F473W-L475T Fwd                       | CCCAATCCGTCTGCGCTGGGGAACCCACGGGAACTGGGCAAATGCC   |
|    | F473W-L475T Rev                       | GGCATTGCCCAGTTCCTGGGTTCCCCAGCGCAGACGGATTGGG      |
| 34 | F281M S283I F307H <sup>1</sup><br>Fwd | GGCCAAAAACAATATGTGGCCTTTTTTTCCCGACG              |
|    | F281M S283I F307H <sup>1</sup><br>Rev | CGTCGGGAAAAAAGGCCACATATTGTTTTGGCC                |
| 35 | F281M S283T F307H <sup>2</sup><br>Fwd | GGCCAAAAACAATATGTGGCCTTTTTTTCCCGACG              |
|    | F281M S283T F307H <sup>2</sup><br>Rev | CGTCGGGAAAAAAGGCCACATATTGTTTTGGCC                |

<sup>1</sup> F307H mutation was introduced using the gene containing F281M\_S283I mutations

<sup>2</sup> F307H mutation was introduced using the gene containing F281M\_S283T mutations

**Table S2.** Data collection and refinement statistics for the crystal structure of S283F.

|                                                     |                                                 |
|-----------------------------------------------------|-------------------------------------------------|
| Space group                                         | C222                                            |
| Unit cell axes (Å)                                  | $a = 178.471$<br>$b = 187.984$<br>$c = 105.867$ |
| Resolution (Å)                                      | 2.9                                             |
| PDB code                                            | 7QR6                                            |
| $R_{\text{sym}}^{a,b}$ (%)                          | 9.2 (73.1)                                      |
| $CC_{1/2}$ (%)                                      | 98.1 (30.3)                                     |
| Completeness (%)                                    | 98.9 (97.5)                                     |
| Unique reflections                                  | 36,348                                          |
| Redundancy                                          | 3.5 (3.5)                                       |
| $I/\sigma^b$                                        | 6.1 (1.6)                                       |
| N° of non-hydrogen atoms <sup>c</sup>               |                                                 |
| protein/Fe                                          | 11370/3                                         |
| water                                               | 16                                              |
| Average B value for protein atoms (Å <sup>2</sup> ) | 71.0                                            |
| $R_{\text{cryst}}^{b,d}$ (%)                        | 21.8                                            |
| $R_{\text{free}}^{b,d}$ (%)                         | 29.0                                            |
| Rms bond length (Å)                                 | 0.008                                           |
| Rms bond angles (°)                                 | 1.48                                            |

<sup>a</sup>  $R_{\text{sym}} = \sum |I_i - \langle I \rangle| / \sum I_i$ , where  $I_i$  is the intensity of  $i^{\text{th}}$  observation and  $\langle I \rangle$  is the mean intensity of the reflection.

<sup>b</sup> Values in parentheses are for reflections in the highest resolution shell.

<sup>c</sup> The asymmetric unit contains three protein chains. The final model comprises residues 10-382 and 391-488 of subunit A, 5-382 and 391-488 of subunit B, 3-382, and 391-488 of subunit C.

<sup>d</sup>  $R_{\text{cryst}} = \sum |F_{\text{obs}} - F_{\text{calc}}| / \sum |F_{\text{obs}}|$  where  $F_{\text{obs}}$  and  $F_{\text{calc}}$  are the observed and calculated structure factor amplitudes, respectively.  $R_{\text{cryst}}$  and  $R_{\text{free}}$  were calculated using the working and test sets, respectively.

**Table S3.** Mutant design and variants' enzymatic activity. Reactions were performed using cell-crude extracts in 0.1 M Tris-HCl, pH 9, in the presence of 1 mM isoeugenol at room temperature.

| #  | Enzyme            | Rational design   | Initial Activity (iA) (mU/mL) | Relative activity to the wild-type ( $iA_{\text{variant}}/iA_{\text{WT}}$ ) |
|----|-------------------|-------------------|-------------------------------|-----------------------------------------------------------------------------|
|    | Wild-type         |                   | 0.252 ± 0.027                 | -                                                                           |
| 1  | N120L             | <sup>19</sup>     | nd                            | nd                                                                          |
| 2  | N120S             | Rosetta + docking | 0.019 ± 0.006                 | 0.07 ± 0.03                                                                 |
| 3  | T121P             | Rosetta           | nd                            | nd                                                                          |
| 4  | T121A             | Rosetta + docking | 0.052 ± 0.009                 | 0.18 ± 0.03                                                                 |
| 5  | F281W             | <sup>18</sup>     | 0.047 ± 0.011                 | 0.23 ± 0.05                                                                 |
| 6  | S283F             | <sup>16</sup>     | 0.433 ± 0.082                 | 1.50 ± 0.29                                                                 |
| 7  | S283Q             | <sup>19</sup>     | 0.031 ± 0.005                 | 0.15 ± 0.02                                                                 |
| 8  | S283I             | Rosetta + docking | 0.044 ± 0.019                 | 0.18 ± 0.08                                                                 |
| 9  | S283E             | Rosetta + docking | 0.040 ± 0.010                 | 0.17 ± 0.04                                                                 |
| 10 | S283N             | Rosetta + docking | nd                            | nd                                                                          |
| 11 | S283V             | Rosetta + docking | 0.118 ± 0.027                 | 0.61 ± 0.14                                                                 |
| 12 | S283C             | Rosetta + docking | 0.012 ± 0.004                 | 0.05 ± 0.02                                                                 |
| 13 | S283T             | Rosetta + docking | 0.063 ± 0.018                 | 0.26 ± 0.02                                                                 |
| 14 | F307H             | Visual inspection | 0.017 ± 0.010                 | 0.07 ± 0.04                                                                 |
| 15 | F307W             | <sup>14</sup>     | 0.030 ± 0.006                 | 0.10 ± 0.02                                                                 |
| 16 | F309W             | Rosetta + docking | 0.016 ± 0.003                 | 0.05 ± 0.01                                                                 |
| 17 | F473W             | Rosetta + docking | 0.020 ± 0.005                 | 0.07 ± 0.02                                                                 |
| 18 | F473E             | Rosetta + docking | 0.018 ± 0.004                 | 0.06 ± 0.01                                                                 |
| 19 | F473Q             | Rosetta + docking | 0.014 ± 0.005                 | 0.06 ± 0.02                                                                 |
| 20 | L475S             | <sup>19</sup>     | 0.011 ± 0.004                 | 0.04 ± 0.02                                                                 |
| 21 | L475G             | Rosetta           | 0.017 ± 0.004                 | 0.07 ± 0.02                                                                 |
| 22 | L475T             | Rosetta + docking | 0.016 ± 0.003                 | 0.05 ± 0.01                                                                 |
| 23 | E353D             | Rosetta + docking | 0.013 ± 0.006                 | 0.05 ± 0.03                                                                 |
| 24 | F281C S283I       | Rosetta + docking | 0.283 ± 0.055                 | 1.02 ± 0.18                                                                 |
| 25 | F281C S283T       | Rosetta + docking | 0.015 ± 0.005                 | 0.05 ± 0.02                                                                 |
| 26 | F281I S283V       | Rosetta + docking | 0.012 ± 0.004                 | 0.05 ± 0.02                                                                 |
| 27 | F281H S283I       | Rosetta + docking | 0.193 ± 0.043                 | 0.70 ± 0.14                                                                 |
| 28 | F281H S283V       | Rosetta + docking | 0.011 ± 0.003                 | 0.04 ± 0.02                                                                 |
| 29 | F281M S283I       | Rosetta + docking | 0.273 ± 0.048                 | 0.98 ± 0.16                                                                 |
| 30 | F281M S283T       | Rosetta           | 0.282 ± 0.061                 | 1.02 ± 0.20                                                                 |
| 31 | F281M S283V       | Rosetta + docking | 0.252 ± 0.023                 | 0.90 ± 0.09                                                                 |
| 32 | F473W L475G       | Rosetta + docking | 0.022 ± 0.004                 | 0.09 ± 0.02                                                                 |
| 33 | F473W L475T       | Rosetta + docking | 0.017 ± 0.003                 | 0.07 ± 0.03                                                                 |
| 34 | F281M S283I F307H | Rosetta + docking | 0.038 ± 0.015                 | 0.20 ± 0.10                                                                 |
| 35 | F281M S283T F307H | Rosetta + docking | 0.014 ± 0.007                 | 0.04 ± 0.03                                                                 |

nd – not detected

**Table S4.** Comparison of performance of whole-cell reactions in the conversion of isoeugenol in vanillin.

| Enzyme       | Origin                                 | Cell dry weight (mg/mL) | Organic solvent % (v/v) | Substrate (mM) | Molar conversion yields (%) | Ref           |
|--------------|----------------------------------------|-------------------------|-------------------------|----------------|-----------------------------|---------------|
| NOV1-S283F   | <i>Novosphingobium aromatocivorans</i> | 1.3                     | 3.5% Ethanol            | 100            | >99                         | This study    |
| IE27         | <i>Pseudomonas putida</i>              | 15                      | 10% DMSO                | 230            | 81                          | <sup>19</sup> |
| IEM720-F281Q | metagenome                             | 34                      | 10% DMSO                | 100            | 75                          | <sup>20</sup> |
| HsCCO        | <i>Herbaspirillum seropedicae</i>      | 18                      | 10% glycerol            | 10             | 80                          | <sup>21</sup> |
| RbCCO        | <i>Rhodobacteraceae bacterium</i>      | 18                      | 10% glycerol            | 10             | 75                          | <sup>21</sup> |



**Table S5.** Binding energy ( $\Delta G$ ) and dihedral energy ( $\Delta E$ ) values in kcal/mol found for isoeugenol and resveratrol at the binding site of wild-type and S283F NOV1 variant in the ensemble docking experiments.

| variant | Isoeugenol                  |       |                              |       |                                     | Resveratrol                 |       |                              |       |                                     |
|---------|-----------------------------|-------|------------------------------|-------|-------------------------------------|-----------------------------|-------|------------------------------|-------|-------------------------------------|
|         | $\Delta G_{\text{binding}}$ |       | $\Delta E_{\text{dihedral}}$ |       | $\Delta \Delta E_{\text{dihedral}}$ | $\Delta G_{\text{binding}}$ |       | $\Delta E_{\text{dihedral}}$ |       | $\Delta \Delta E_{\text{dihedral}}$ |
|         | WT                          | S283F | WT                           | S283F | (S283F-WT)                          | WT                          | S283F | WT                           | S283F | (S283F-WT)                          |
| mean    | -5.97                       | -5.96 | 9.24                         | 10.25 | 1.01                                | -6.80                       | -6.98 | 14.55                        | 18.87 | 4.32                                |
| std     | 0.62                        | 0.50  | 3.69                         | 4.16  | 0.48                                | 1.34                        | 0.38  | 5.21                         | 5.54  | 0.33                                |
| min     | -7.10                       | -6.84 | 0.92                         | 2.27  | 1.35                                | -8.64                       | -7.52 | 3.92                         | 8.77  | 4.85                                |
| 25%     | -6.37                       | -6.34 | 6.84                         | 7.30  | <b>0.46</b>                         | -7.64                       | -7.30 | 11.39                        | 15.53 | <b>4.14</b>                         |
| 50%     | -6.07                       | -5.93 | 9.43                         | 9.97  | <b>0.54</b>                         | -7.20                       | -7.03 | 14.10                        | 19.69 | <b>5.59</b>                         |
| 75%     | -5.64                       | -5.67 | 11.48                        | 13.22 | <b>1.74</b>                         | -6.30                       | -6.81 | 16.94                        | 22.65 | <b>5.71</b>                         |
| max     | -2.77                       | -4.89 | 18.38                        | 18.42 | 0.04                                | 0.80                        | -6.24 | 31.35                        | 28.45 | -2.90                               |

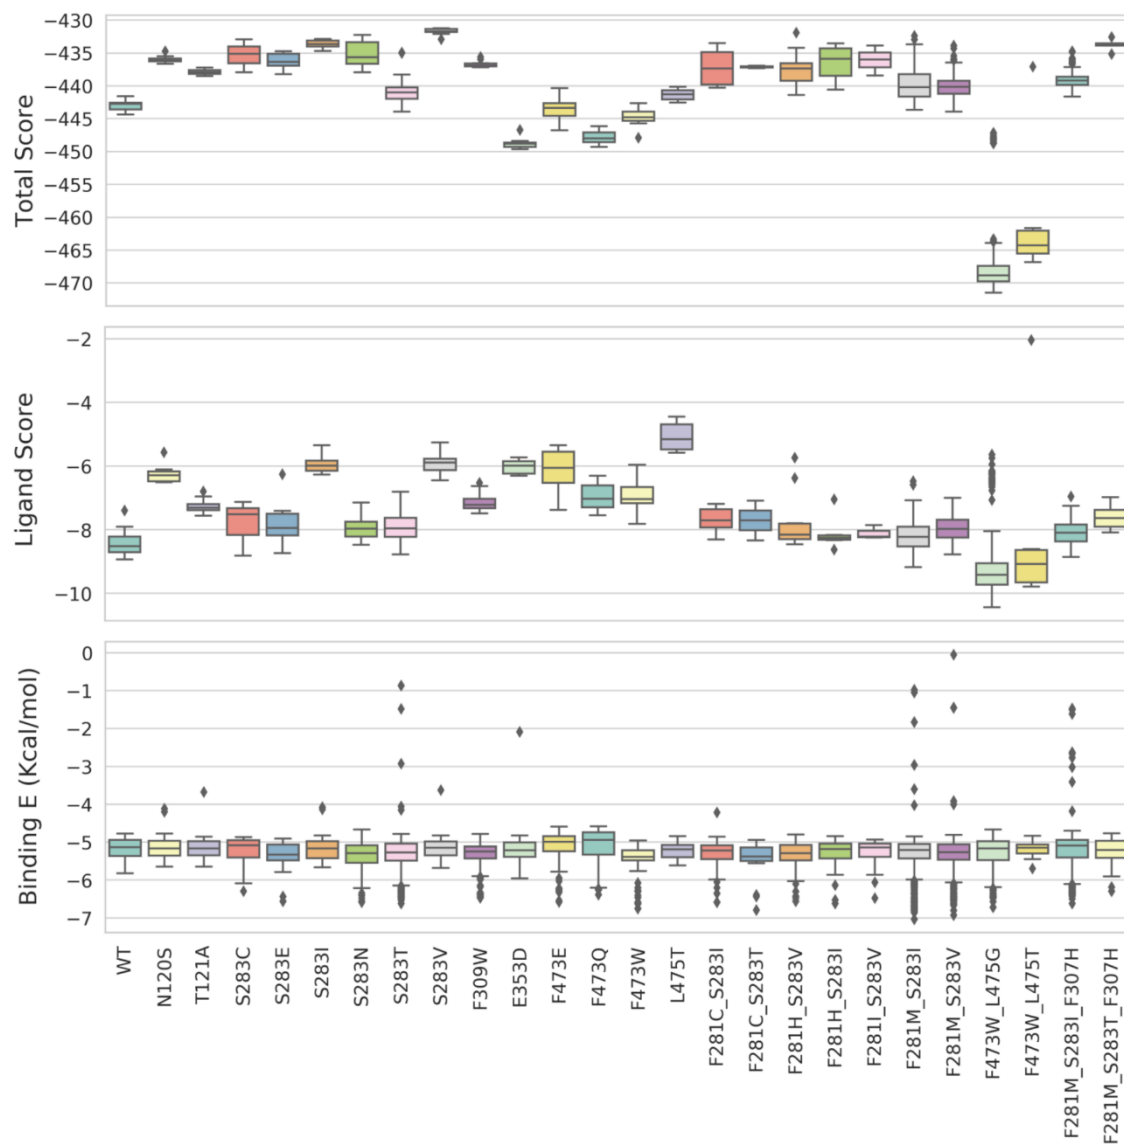

**Fig. S1.** Rosetta Ligand Score, Rosetta Total Score, and VINA Autodock binding energy values for the *in silico* variants selected for experimental validation.

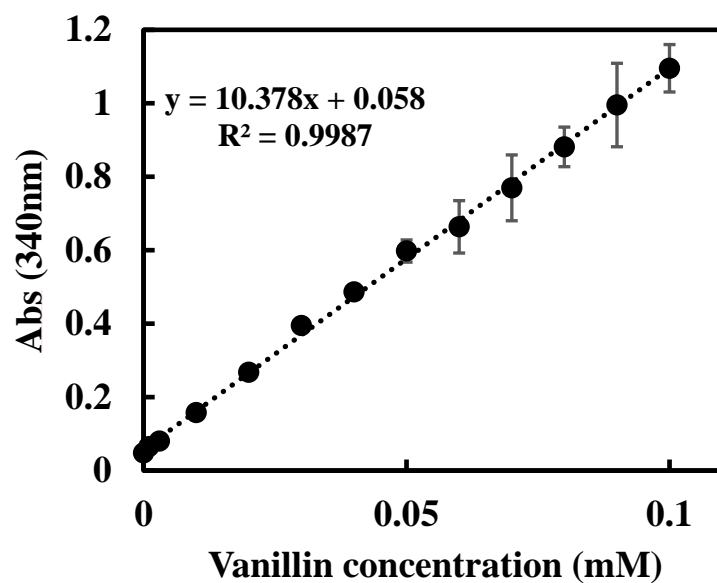

**Fig. S2.** Calibration curve for vanillin quantification. The  $Abs_{340nm}$  was measured for vanillin concentrations from 0 to 0.1 mM and the epsilon for vanillin ( $\epsilon_{vanillin}$ ) was determined by resorting to the Lambert-Beer law equation,  $A = \epsilon \cdot l \cdot c$ .  $\epsilon_{vanillin} = 15.97 \text{ mL } \mu\text{mol}^{-1} \text{ cm}^{-1}$  ( $l = 0.65 \text{ cm}$ ).

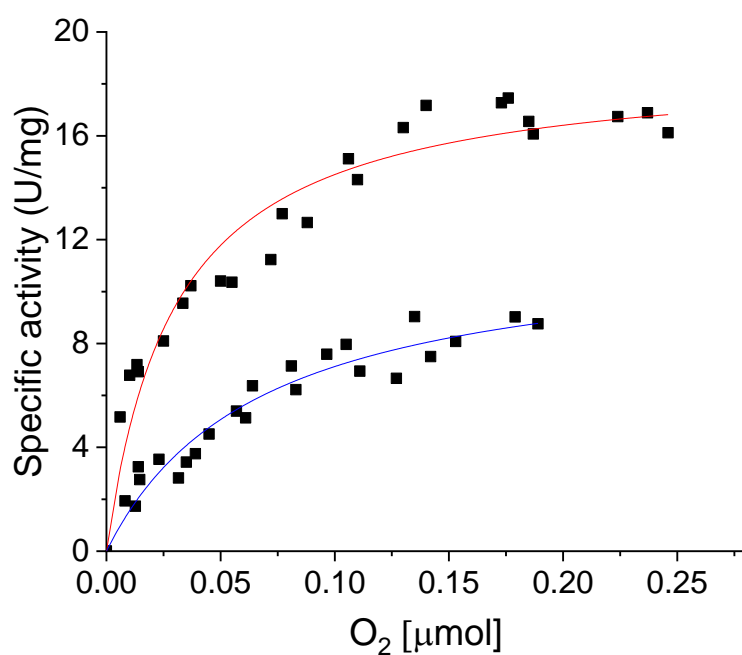

**Fig. S3.** Steady-state kinetic analyses of reactions of isoeugenol and O<sub>2</sub> catalyzed by wild-type (blue line) and S283F variant (red line). Reactions were started by adding the enzyme to a nitrogen-purged mixture containing 4 mM isoeugenol in 100 mM Tris-HCl, pH 9. Kinetic data were fitted directly to the Michaelis-Menten equation using the Origin<sup>®</sup> software.

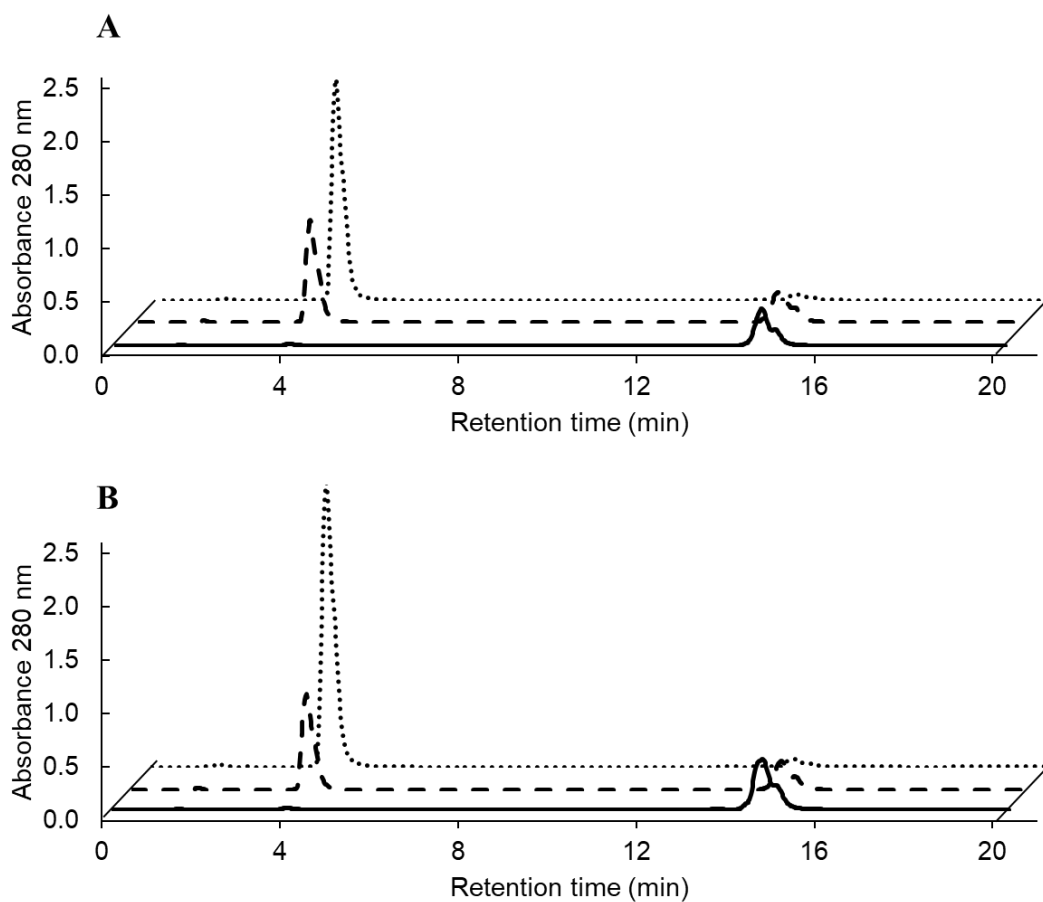

**Fig. S4.** HPLC-elution profile (280 nm) of reactions performed with purified wild-type (**A**) and S283F variant (**B**) preparations. Aliquots were taken at initial time (solid line) and after 15 min (dash line) and 90 min (dot line) of reaction. Retention time for vanillin and isoeugenol are 3.9 and 14.5 min, respectively.

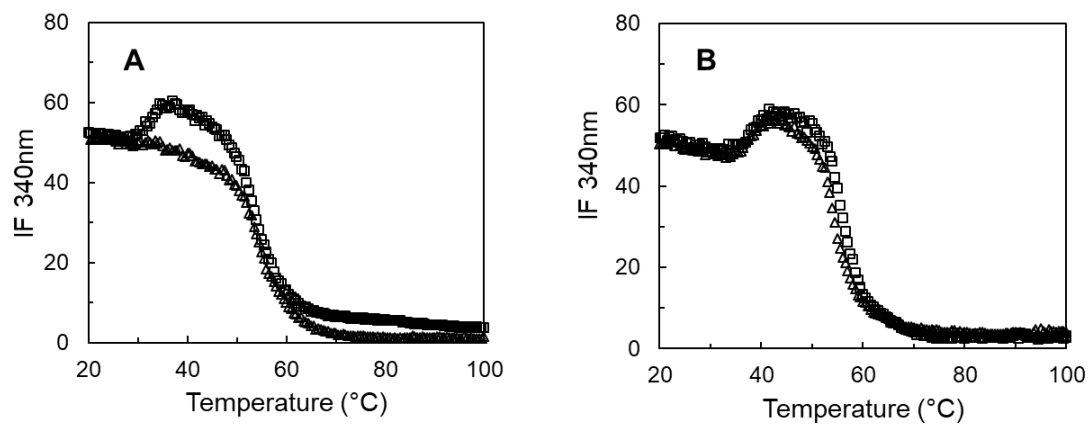

**Fig. S5.** Tryptophan fluorescence emission at 340 nm at increasing temperatures of wild-type (A) and S283F variant (B) in the absence (squares) and after incubation with 2000 equivalents of EDTA (triangles).

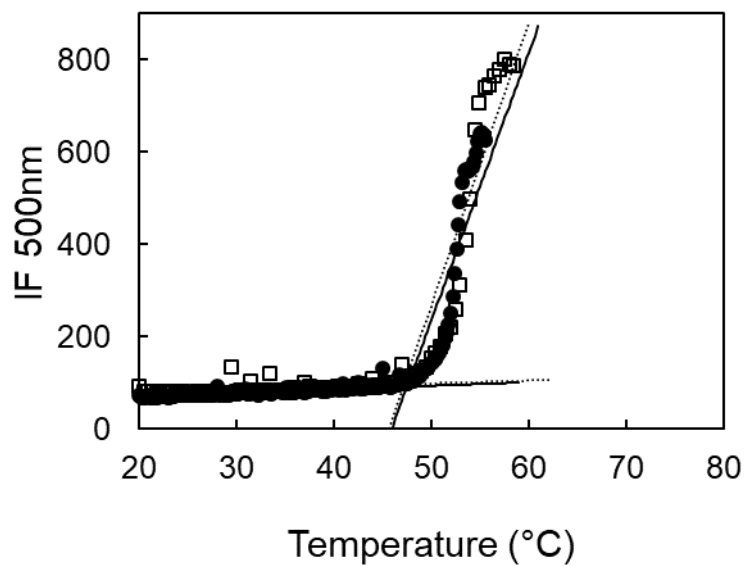

**Fig. S6.** Static light scattering at 500 nm ( $T_{\text{agg}} = 47^{\circ}\text{C}$ ) for wild-type (filled circles) and S283F variant (empty squares).

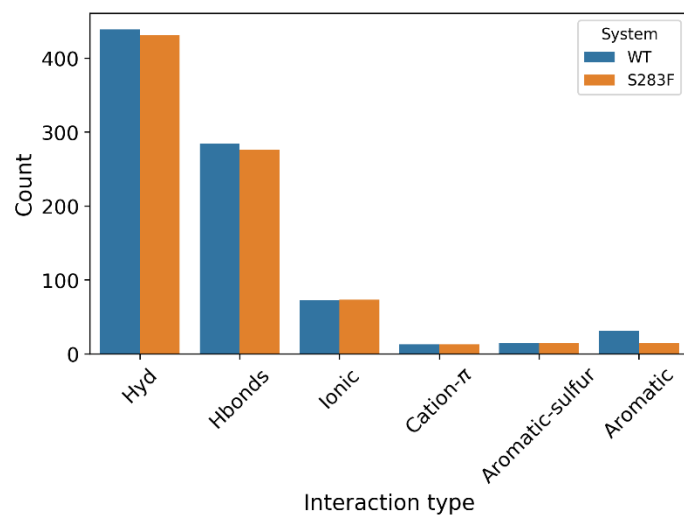

**Fig. S7.** Inter-residue interaction analysis was performed with PIC (Protein Interaction Calculator) using the X-ray structures of wild-type NOV1 (PDB: 55j5) and S283F variant (this work). Overall counting of interactions depicted by PIC in both wild-type NOV1 and variant. It includes sidechain-sidechain, backbone-backbone, and sidechain-backbone interactions.



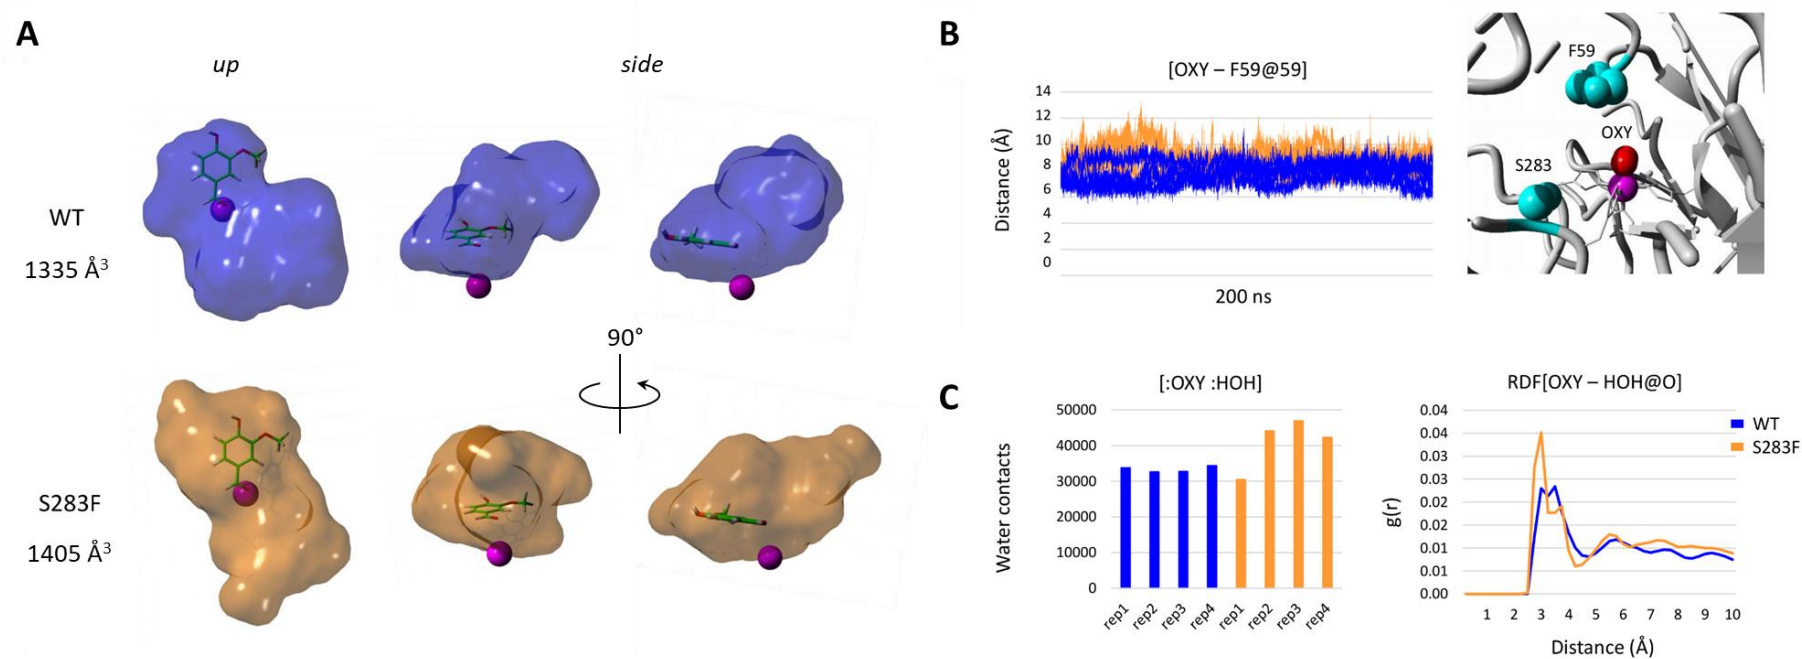

**Fig. S8.** (A) Empty volumes of the active site of the wild-type NOV1 (blue) and S283F variant (orange) calculated with MDpocket over 800 ns of MD simulation. The vanillin ligand found in the X-ray 5J55 is superposed. (B) Distance between the molecular oxygen bound to Fe and the center of mass of the ring of Phe59 along with the four replicas of 200 ns MD simulation. (C) Water counting inside the active site (left) and Radial Distribution Function (RDF) (right) of water molecules concerning the molecular oxygen during 800 ns of MD simulation.

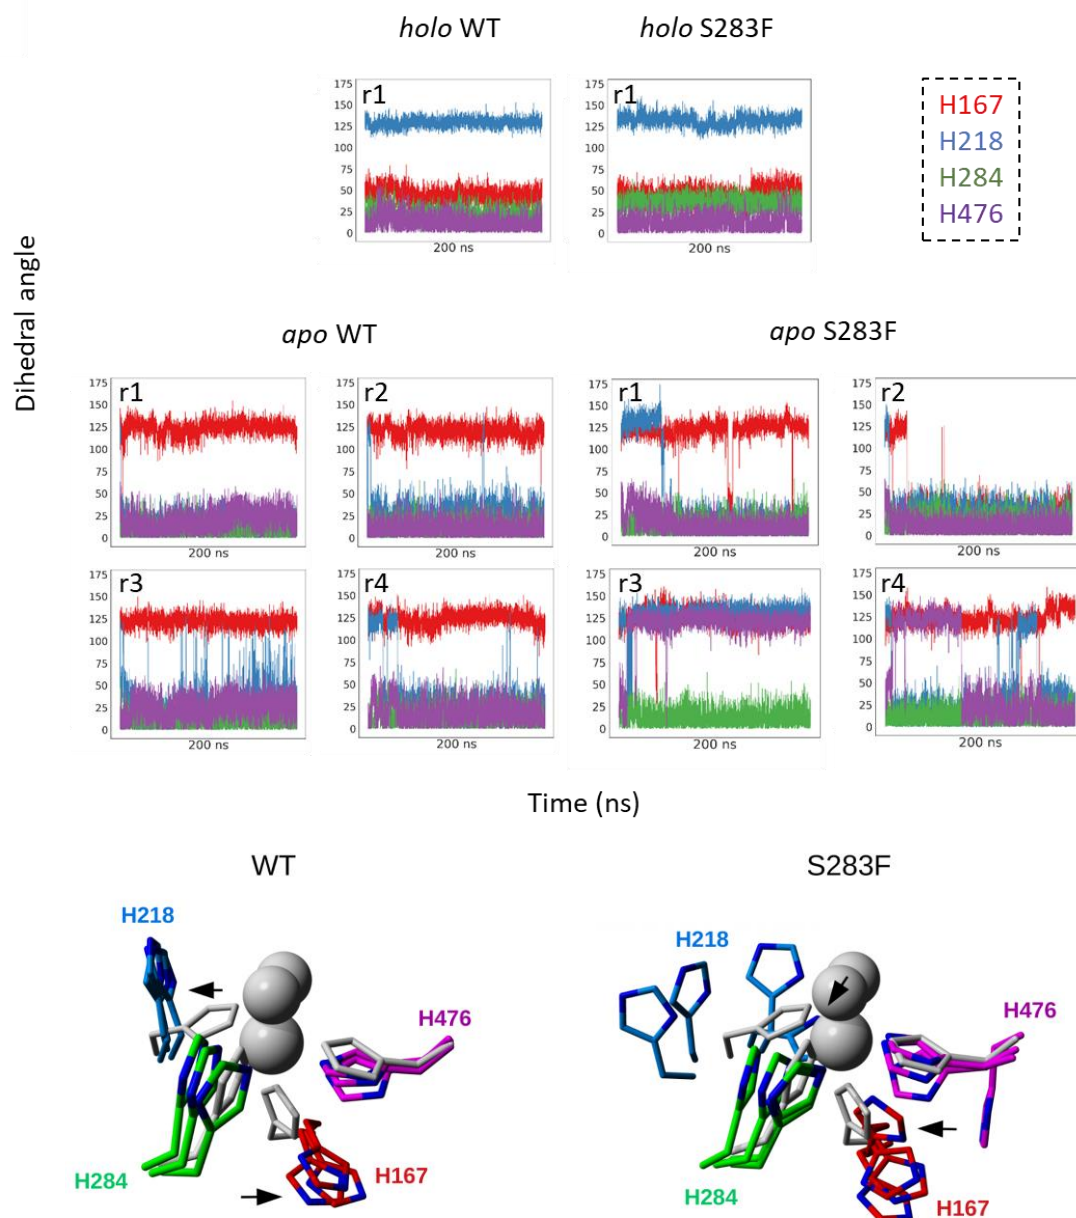

**Fig. S9.** On the top, dihedral angles [C-CA-CB-CG] define the orientation of the histidine 167 (red), 218 (blue), 284 (green), and 476 (purple) side chains, measured on the four replicas of 200 ns MD simulation. The values for the wild-type and mutant in their *holo* (Fe-bound) and *apo* (Fe-free) forms are represented. For simplicity, only one replica is shown for the *holo* form (which is consistent for the four replicas). The bottom illustrates the most representative clusters concerning the histidines conformations along with the MD simulation of the iron-free form of both WT and mutant. For comparison, these appear superposed with the catalytic center of the Fe(II)-O<sub>2</sub> bound state as it appears in the 5J55 X-ray structure.

## REFERENCES

1. McAndrew, R. P.; Sathitsuksanoh, N.; Mbughuni, M. M.; Heins, R. A.; Pereira, J. H.; George, A.; Sale, K. L.; Fox, B. G.; Simmons, B. A.; Adams, P. D., Structure and Mechanism of NOV1, A Resveratrol-Cleaving Dioxygenase. *Proc Nat Acad Sci USA* **2016**, *113*, 14324-14329.
2. Krieger, E.; Dunbrack, R. L., Jr.; Hooft, R. W.; Krieger, B., Assignment Of Protonation States In Proteins And Ligands: Combining Pka Prediction With Hydrogen Bonding Network Optimization. *Methods Mol Biol* **2012**, *819*, 405-21.
3. Canutescu, A. A.; Dunbrack, R. L., Jr., Cyclic Coordinate Descent: A Robotics Algorithm For Protein Loop Closure. *Protein Sci* **2003**, *12*, 963-72.
4. Hornak, V.; Abel, R.; Okur, A.; Strockbine, B.; Roitberg, A.; Simmerling, C., Comparison Of Multiple Amber Force Fields And Development Of Improved Protein Backbone Parameters. *Proteins* **2006**, *65*, 712-725.
5. Krieger, E.; Vriend, G., New Ways To Boost Molecular Dynamics Simulations. *J Comput Chem* **2015**, *36*, 996-1007.
6. Berendsen, H. J. C.; Postma, J. P. M.; Vangunsteren, W. F.; Dinola, A.; Haak, J. R., Molecular-Dynamics with Coupling to an External Bath. *J. Chem. Phys.* **1984**, *81*, 3684-3690.
7. Mark, P.; Nilsson, L., Structure And Dynamics Of The TIP3P, SPC, And SPC/E Water Models at 298 K. *J Phys Chem A* **2001**, *105* (43), 9954-9960.
8. Essmann, U.; Perera, L.; Berkowitz, M. L.; Darden, T.; Lee, H.; Pedersen, L. G., A Smooth Particle Mesh Ewald Method. *J Chem Phys* **1995**, *103*, 8577-8593.
9. Hess, B.; Bekker, H.; Berendsen, H. J. C.; Fraaije, J. G. E. M., LINCS: A Linear Constraint Solver For Molecular Simulations. *J Comput Chem* **1997**, *18*, 1463-1472.
10. Miyamoto, S.; Kollman, P. A., Settle - an Analytical Version of the Shake and Rattle Algorithm for Rigid Water Models. *J. Comput. Chem.* **1992**, *13*, 952-962.
11. Schmidtke, P.; Le Guilloux, V.; Maupetit, J.; Tuffery, P., fpocket: Online Tools For Protein Ensemble Pocket Detection And Tracking. *Nucleic Acids Res* **2010**, *38*, W582-9.
12. Le Guilloux, V.; Schmidtke, P.; Tuffery, P., Fpocket: an Open Source Platform For Ligand Pocket Detection. *BMC Bioinformatics* **2009**, *10*, 168.
13. Krieger, E.; Vriend, G., YASARA View-Molecular Graphics For All Devices-From Smartphones To Workstations. *Bioinformatics* **2014**, *30*, 2981-2982.
14. Schrodinger, L., The PyMOL Molecular Graphics System. **2010**.
15. Reback J., j., Wes McKinney W., Van den Bossche J., Augspurger T., Cloud P., Dong K., pandas-dev/pandas: Pandas 1.3.0 (Version v1.3.0). Zenodo. **2021**.
16. McKinney, W., Data Structures for Statistical Computing in Python. *Proc. Of The 9th Python In Science Conf* **2010**.
17. Harris, C. R.; Millman, K. J.; van der Walt, S. J.; Gommers, R.; Virtanen, P.; Cournapeau, D.; Wieser, E.; Taylor, J.; Berg, S.; Smith, N. J.; Kern, R.; Picus, M.; Hoyer, S.; van Kerkwijk, M. H.; Brett, M.; Haldane, A.; Del Rio, J. F.; Wiebe, M.; Peterson, P.; Gerard-Marchant, P.; Sheppard, K.; Reddy, T.; Weckesser, W.; Abbasi, H.; Gohlke, C.; Oliphant, T. E., Array Programming with NumPy. *Nature* **2020**, *585*, 357-362.
18. Waskom, M. L., seaborn: statistical data visualization. *J Open Source Software* **2021**, *6*, 3021.
19. Yamada, M.; Okada, Y.; Yoshida, T.; Nagasawa, T., Vanillin Production Using Escherichia Coli Cells Over-Expressing Isoeugenol Monooxygenase of *Pseudomonas putida*. *Biotechnol Lett* **2008**, *30*, 665-670.

20. Zhao, L.; Jiang, Y.; Fang, H.; Zhang, H.; Cheng, S.; Rajoka, M. S. R.; Wu, Y., Biotransformation of Isoeugenol into Vanillin Using Immobilized Recombinant Cells Containing Isoeugenol Monooxygenase Active Aggregates. *Appl Biochem Biotechnol* **2019**, *189*, 448-458.
21. Han, Z.; Long, L.; Ding, S., Expression and Characterization of Carotenoid Cleavage Oxygenases From *Herbaspirillum seropedicae* and *Rhodobacteraceae* bacterium Capable of Biotransforming Isoeugenol and 4-Vinylguaiacol to Vanillin. *Front Microbiol* **2019**, *10*, 1869.
